# Supplementary material for: Low prevalence of IgA anti-transglutaminase 1, 2, and 3 autoantibodies in children with atopic dermatitis
Source: PubMed Central journal article supplement (PMC4045883; doi:10.1186/1756-0500-7-310), 2014-05-22
Supplement: 1756-0500-7-310-S1.pdf [file 1756-0500-7-310-S1.pdf]

**Additional table.** Characterization of IgA-anti-TG1 and IgA-anti-TG3 seropositive cases.

| Patient no.                                              | Age (y) | Sex | IgA-anti-TG2 (pos >10 U/ml) | IgA-anti-TG1 (pos >37.3 AU) | IgA-anti-TG3 (pos > 48.4 AU) | IgA-anti-DGP (pos > 10 U/ml) | Clinical presentation                             |
|----------------------------------------------------------|---------|-----|-----------------------------|-----------------------------|------------------------------|------------------------------|---------------------------------------------------|
| <b>Atopic dermatitis</b>                                 |         |     |                             |                             |                              |                              |                                                   |
| AT002                                                    | 10      | F   | 0.7                         | 15.2                        | <b>49.3*</b>                 | 0.3                          |                                                   |
| AT048                                                    | 9       | F   | 0.6                         | 10.5                        | <b>55.2</b>                  | 0.9                          |                                                   |
| AT052                                                    | 4       | F   | 0.1                         | 19.7                        | <b>60.5</b>                  | 0.3                          |                                                   |
| AT215                                                    | 6       | M   | 0.2                         | <b>60.0</b>                 | 19.0                         | 0.8                          | asthma                                            |
| AT219                                                    | 3       | M   | 0.0                         | 20.2                        | <b>56.5</b>                  | 0.7                          | allergic rhinoconjunctivitis, asthma              |
| AT247                                                    | 18      | F   | 0.5                         | <b>42.8</b>                 | 34.4                         | 0.9                          | allergic rhinoconjunctivitis, asthma              |
| AT250                                                    | 8       | F   | 0.1                         | 16.8                        | <b>102.8</b>                 | 1.7                          |                                                   |
| AT266                                                    | 3       | M   | 0.2                         | <b>47.2</b>                 | 39.6                         | 0.5                          |                                                   |
| AT267                                                    | 18      | M   | 0.4                         | <b>188.6</b>                | <b>134.6</b>                 | 1.7                          | allergic rhinoconjunctivitis, asthma, urticaria   |
| AT298                                                    | 12      | F   | 1.0                         | 31.3                        | <b>50.2</b>                  | 1.1                          | allergic rhinoconjunctivitis, asthma              |
| AT329                                                    | 2       | F   | 0.2                         | 16.2                        | <b>57.1</b>                  | 0.3                          |                                                   |
| AT361                                                    | 17      | F   | 0.4                         | 30.4                        | <b>75.9</b>                  | 1.1                          |                                                   |
| AT380                                                    | 6       | M   | 0.1                         | <b>70.0</b>                 | 12.0                         | 1.4                          |                                                   |
| AT381                                                    | 2       | M   | 0.4                         | <b>50.0</b>                 | 12.0                         | 1.2                          |                                                   |
| <b>Atopic dermatitis and concomitant coeliac disease</b> |         |     |                             |                             |                              |                              |                                                   |
| AT018                                                    | 7       | F   | <b>128</b>                  | <b>95.2</b>                 | 0                            | <b>11.5</b>                  | silent coeliac disease, allergic rhinitis, asthma |
| AT091                                                    | 3       | F   | <b>&gt;128</b>              | <b>40.5</b>                 | 3.5                          | <b>142.0</b>                 | silent coeliac disease                            |
| <b>Coeliac disease</b>                                   |         |     |                             |                             |                              |                              |                                                   |
| TT006                                                    | 10      | M   | <b>128.0</b>                | <b>51.8</b>                 | 31.1                         | <b>84.1</b>                  | atypical gastrointestinal coeliac disease         |
| CD08                                                     | 10      | M   | <b>117</b>                  | <b>46.6</b>                 | 17.1                         | 9.9                          | classical coeliac disease; type 1 diabetes        |
| CD34                                                     | 9       | F   | <b>160</b>                  | <b>79.5</b>                 | <b>104.8</b>                 | 25.0                         | classical coeliac disease; type 1 diabetes        |
| CD45                                                     | 11      | M   | <b>152</b>                  | 8.7                         | <b>104.7</b>                 | 15.0                         | silent coeliac disease                            |
| VA4                                                      | 1       | F   | <b>73.9</b>                 | <b>161.6</b>                | <b>94.3</b>                  | 128.0                        | classical coeliac disease                         |
| VA27                                                     | 7       | F   | <b>128</b>                  | <b>276.3</b>                | <b>95.0</b>                  | 128.0                        | classical coeliac disease; type 1 diabetes        |
| VA28                                                     | 1       | F   | <b>13.5</b>                 | <b>48.2</b>                 | 37.5                         | 128.0                        | classical coeliac disease                         |
| VA36                                                     | 15      | M   | <b>128</b>                  | <b>129.0</b>                | <b>1039.5</b>                | 128.0                        | classical coeliac disease                         |
| VA40                                                     | 8       | F   | <b>59.2</b>                 | <b>43.6</b>                 | 15.7                         | 128.0                        | classical coeliac disease; type 1 diabetes        |
| VA67                                                     | 14      | F   | <b>60.6</b>                 | <b>42.0</b>                 | 26.3                         | 15.0                         | classical coeliac disease; type 1 diabetes        |
| VA69                                                     | 1       | F   | <b>76.2</b>                 | <b>117.8</b>                | 41.6                         | 128.0                        | classical coeliac disease                         |
| <b>Control group</b>                                     |         |     |                             |                             |                              |                              |                                                   |
| TT009                                                    | 0.5     | F   | 0.0                         | <b>63.8</b>                 | <b>60.2</b>                  | 1.7                          | cystic fibrosis, diarrhoea                        |
| TT031                                                    | 10      | F   | 0.2                         | <b>55.9</b>                 | 14.2                         | 2.9                          | gastritis ( <i>H. pylori</i> )                    |
| TT053                                                    | 13      | M   | 0.7                         | 25.5                        | <b>91.9</b>                  | 1.1                          | gastritis ( <i>H. pylori</i> )                    |

\*Values marked in bold – positive values for IgA-anti-TG2 and IgA-anti-DGP (based on manufacturer's recommendations) and for IgA-anti-TG1 and IgA-anti-TG3 (based on the mean+2SD in control subjects).
